# Supplementary material for: Computational studies of human class V alcohol dehydrogenase - the odd sibling
Source: PubMed Central journal article supplement (PMC4960878; doi:10.1186/s12858-016-0072-y), 2016-07-25
Supplement: 12858_2016_72_MOESM1_ESM.pdf [file 12858_2016_72_MOESM1_ESM.pdf]

**Supplementary Table 1:** Nomenclature for Human Alcohol Dehydrogenase

| The Class System |                       | Suggested System<br>Protein and Gene | Uni-Prot KB | Gene Nomenclature |      |
|------------------|-----------------------|--------------------------------------|-------------|-------------------|------|
|                  |                       |                                      |             | New               | Old  |
| Class I          | $\alpha$ -subunit     | ADH1A                                | ADH1A_HUMAN | ADH1A             | ADH1 |
| Class I          | $\beta$ -subunit      | ADH1B                                | ADH1B_HUMAN | ADH1B             | ADH2 |
| Class I          | $\gamma$ -subunit     | ADH1C                                | ADH1G_HUMAN | ADH1C             | ADH3 |
| Class II         | $\pi$ -subunit        | ADH2                                 | ADH4_HUMAN  | ADH4              | ADH4 |
| Class III        | $\chi$ -subunit       | ADH3                                 | ADHX_HUMAN  | ADH5              | ADH5 |
| Class IV         | $\mu/\sigma$ -subunit | ADH4                                 | ADH7_HUMAN  | ADH7              | ADH7 |
| Class V          |                       | ADH5                                 | ADH6_HUMAN  | ADH6              | ADH6 |
